# Supplementary material for: OCT Based Interpretation of the Optic Nerve Head Anatomy and Prevalence of Optic Disc Drusen in Patients with Idiopathic Intracranial Hypertension (IIH)
Source: MDPI journal article supplement (doi:10.3390/life11060584), 2021-06-19
Supplement: s1 [file s1]

**IIH patients with available EDI-OCT of the optic nerve head at follow up**

| <b>RNFL (General) OD, <math>\mu\text{m}</math></b> | <b>OS</b> | <b>GCL (Macular) OD, <math>\text{mm}^3</math></b> | <b>OS</b> |
|----------------------------------------------------|-----------|---------------------------------------------------|-----------|
| 102                                                | 109       | 1.34                                              | 1.33      |
| 104                                                | 96        | 1.10                                              | 1.13      |
| 98                                                 | 97        | 1.02                                              | 1.01      |
| 100                                                | 100       | 1.05                                              | 1.08      |
| 88                                                 | 88        | 1.13                                              | 1.11      |
| 103                                                | 100       | 0.93                                              | 0.93      |
| 103                                                | 106       | 1.15                                              | 1.15      |
| 90                                                 | 78        | 1.03                                              | 1.01      |
| 98                                                 | 104       | 1.09                                              | 1.12      |
| 80                                                 | 86        | 1.07                                              | 1.09      |
| 92                                                 | 89        | 1.14                                              | 1.09      |
| 87                                                 | 84        | 0.98                                              | 1.00      |
| 71                                                 | 69        | 0.97                                              | 0.93      |
| 60                                                 | 77        | 0.83                                              | 0.93      |
| 88                                                 | 92        | 0.90                                              | 0.79      |
| 96                                                 | 99        | 0.97                                              | 0.97      |
| 95                                                 | 74        | 1.12                                              | 0.80      |
| 70                                                 | 60        | 1.12                                              | 0.97      |
| 84                                                 | 105       | 1.02                                              | 1.10      |
| 104                                                | 104       | 1.07                                              | 1.09      |
| 98                                                 | 101       | 1.07                                              | 1.06      |
| 104                                                | 96        | 1.02                                              | 1.03      |
| 82                                                 | 84        | 0.97                                              | 0.98      |
| 104                                                | 104       | 1.00                                              | 1.01      |
| 107                                                | 97        | 1.16                                              | 1.16      |
| 55                                                 | 73        | 0.97                                              | 1.11      |
| 123                                                | 122       | 1.23                                              | 1.17      |
| 117                                                | 119       | 1.16                                              | 1.23      |
| 112                                                | 111       | 1.22                                              | 1.35      |
| 93                                                 | 92        | 1.00                                              | 0.99      |
| 101                                                | 98        | 0.85                                              | 0.88      |
| 105                                                | 92        | 1.26                                              | 1.22      |

| Age at onset, years | Age at data collection, years | PHOMS (1 = yes, 0 = no) |
|---------------------|-------------------------------|-------------------------|
| 22                  | 24                            | 1                       |
| 24                  | 25                            | 1                       |
| 21                  | 23                            | 0                       |
| 28                  | 31                            | 0                       |
| 48                  | 54                            | 1                       |
| 42                  | 43                            | 1                       |
| 27                  | 33                            | 1                       |
| 28                  | 31                            | 1                       |
| 22                  | 28                            | 0                       |
| 24                  | 27                            | 1                       |
| 45                  | 47                            | 1                       |
| 23                  | 30                            | 1                       |
| 64                  | 66                            | 1                       |
| 29                  | 30                            | 1                       |
| 38                  | 40                            | 1                       |
| 33                  | 35                            | 1                       |
| 26                  | 27                            | 1                       |
| 23                  | 23                            | 1                       |
| 30                  | 30                            | 1                       |
| 27                  | 27                            | 1                       |
| 21                  | 22                            | 1                       |
| 25                  | 31                            | 1                       |
| 31                  | 33                            | 1                       |
| 32                  | 35                            | 1                       |
| 26                  | 31                            | 1                       |
| 25                  | 29                            | 0                       |
| 45                  | 49                            | 0                       |
| 26                  | 27                            | 1                       |
| 35                  | 36                            | 1                       |
| 26                  | 27                            | 0                       |
| 28                  | 28                            | 1                       |
| 21                  | 24                            | 1                       |

**Colors and abbreviations**

HL: hyperreflective lines

ODD: optic disc drusen

PHOMS: peripapillary hyperreflective ovoid mass-like structures

RNFL: retinal nerve fiber layer (thickness)

GCL: ganglion cell layer (volume)

EDI-OCT: enhanced depth imaging-optical coherence tomography

OD: right eye

OS: left eye
